# Supplementary material for: Gold nanoparticle arrays assembled on the reconstructed surface of block copolymer thin films
Source: Royal Society of Chemistry journal article supplement (doi:10.1039/c3ra43394c), 2013-01-01
Supplement: c3ra43394c.pdf [file c3ra43394c.pdf]

## Various gold nanoparticle arrays assembled on the reconstructed surface of block copolymer thin films

Zhicheng Liu<sup>1,2</sup>, Tongxin Chang<sup>1,2</sup>, Haiying Huang<sup>1,2\*</sup> and Tianbai He<sup>1,2\*</sup>

1. State Key Laboratory of Polymer Physics and Chemistry, Changchun Institute of Applied Chemistry, Chinese Academy of Sciences, Changchun 130022, China.

2. University of Chinese Academy of Sciences, Beijing 100049, China.

E-mail: [tbhe@ciac.jl.cn](mailto:tbhe@ciac.jl.cn) and [hyhuang@ciac.jl.cn](mailto:hyhuang@ciac.jl.cn)

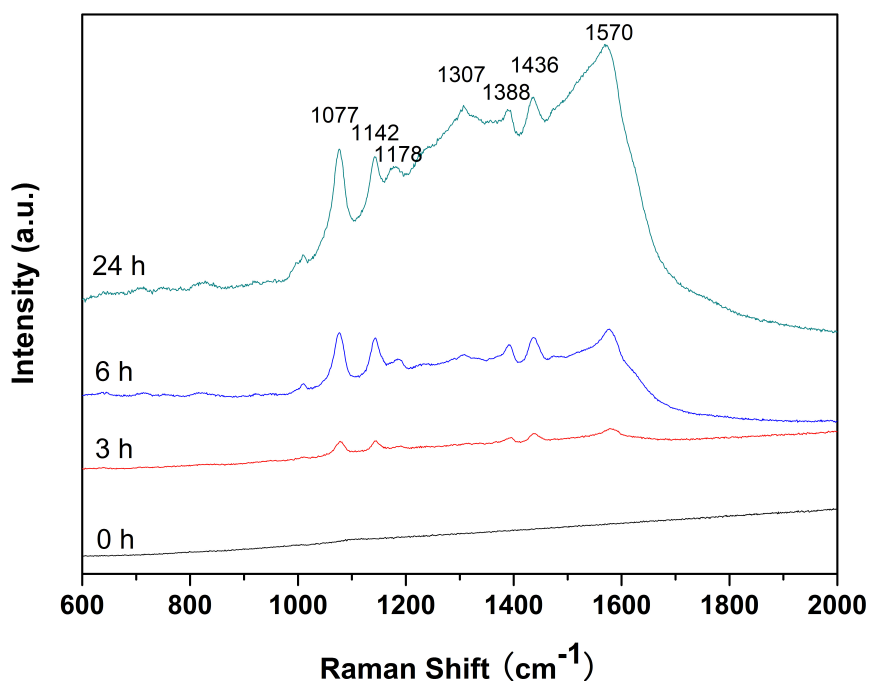

**Fig. S1** SERS spectra of 4-aminothiophenol adsorbed on various gold nanoparticle arrays of different assembly time. It is measured with 633 nm excitation wavelength. The substrates were immersed into 0.8 mM ethanol solution of 4-aminothiophenol for 12 h before the measurement.
